# Supplementary material for: The relationship between miR-21, DNA methylation, and bisphenol a in bovine COCs and granulosa cells
Source: PubMed Central journal article supplement (PMC10684922; doi:10.3389/fcell.2023.1294541), 2023-11-15
Supplement: DataSheet1.pdf [file DataSheet1.pdf]

## Supplementary Material

### 1 Supplementary Figures and Tables

**Supplementary Table 1.** Sequenced Primer product for the bovine TDG gene

| Gene | Primer                                                          | Sequenced Product                                                                                                                                      | Percent Identity |
|------|-----------------------------------------------------------------|--------------------------------------------------------------------------------------------------------------------------------------------------------|------------------|
| TDG  | <b>F:</b> GAACGCGGGCAGCTATTCTC<br><b>R:</b> GTCTCTCGTGTGGGTTCTG | NNNNNNNNNNNNNNNNNNNNNTTCCNTTCCNA<br>CAAATGATGACTGAAGCTCCTGACATGGCA<br>GTTATAAACGCACAAGAAATGCCAGCCGAAGTTC<br>CTGCCCCAGCACCTGCTCAGGAACCCAC<br>ACGAGAGACA | 98%              |

#### Bos taurus thymine DNA glycosylase (TDG), mRNA

Sequence ID: [NM\\_001083696.2](#) Length: 3198 Number of Matches: 1

Range 1: 195 to 307 [GenBank](#) [Graphics](#)

[▼ Next Match](#) [▲ Previous Match](#)

| Score         | Expect                                                       | Identities   | Gaps      | Strand    |
|---------------|--------------------------------------------------------------|--------------|-----------|-----------|
| 202 bits(109) | 4e-50                                                        | 111/113(98%) | 0/113(0%) | Plus/Plus |
| Query 1       | TTTCCNTTCCNACAAATGATGACTGAAGCTCCTGACATGGCAGTTATAAACGCACAAGAA | 60           |           |           |
| Sbjct 195     | TTTCCATTCCAACAAATGATGACTGAAGCTCCTGACATGGCAGTTATAAACGCACAAGAA | 254          |           |           |
| Query 61      | ATGCCAGCCGAAGTTCCTGCCCCAGCACCTGCTCAGGAACCCACACGAGAGAC        | 113          |           |           |
| Sbjct 255     | ATGCCAGCCGAAGTTCCTGCCCCAGCACCTGCTCAGGAACCCACACGAGAGAC        | 307          |           |           |

#### Bos taurus thymine-DNA glycosylase, mRNA (cDNA clone MGC:140185 IMAGE:8168686), complete cds

Sequence ID: [BC134451.1](#) Length: 3199 Number of Matches: 1

Range 1: 196 to 308 [GenBank](#) [Graphics](#)

[▼ Next Match](#) [▲ Previous Match](#)

| Score         | Expect                                                       | Identities   | Gaps      | Strand    |
|---------------|--------------------------------------------------------------|--------------|-----------|-----------|
| 202 bits(109) | 4e-50                                                        | 111/113(98%) | 0/113(0%) | Plus/Plus |
| Query 1       | TTTCCNTTCCNACAAATGATGACTGAAGCTCCTGACATGGCAGTTATAAACGCACAAGAA | 60           |           |           |
| Sbjct 196     | TTTCCATTCCAACAAATGATGACTGAAGCTCCTGACATGGCAGTTATAAACGCACAAGAA | 255          |           |           |
| Query 61      | ATGCCAGCCGAAGTTCCTGCCCCAGCACCTGCTCAGGAACCCACACGAGAGAC        | 113          |           |           |
| Sbjct 256     | ATGCCAGCCGAAGTTCCTGCCCCAGCACCTGCTCAGGAACCCACACGAGAGAC        | 308          |           |           |

#### PREDICTED: Bos taurus thymine DNA glycosylase (TDG), transcript variant X1, mRNA

Sequence ID: [XM\\_024991735.1](#) Length: 3354 Number of Matches: 1

Range 1: 363 to 475 [GenBank](#) [Graphics](#)

[▼ Next Match](#) [▲ Previous Match](#)

| Score         | Expect                                                       | Identities   | Gaps      | Strand    |
|---------------|--------------------------------------------------------------|--------------|-----------|-----------|
| 202 bits(109) | 4e-50                                                        | 111/113(98%) | 0/113(0%) | Plus/Plus |
| Query 1       | TTTCCNTTCCNACAAATGATGACTGAAGCTCCTGACATGGCAGTTATAAACGCACAAGAA | 60           |           |           |
| Sbjct 363     | TTTCCATTCCAACAAATGATGACTGAAGCTCCTGACATGGCAGTTATAAACGCACAAGAA | 422          |           |           |
| Query 61      | ATGCCAGCCGAAGTTCCTGCCCCAGCACCTGCTCAGGAACCCACACGAGAGAC        | 113          |           |           |
| Sbjct 423     | ATGCCAGCCGAAGTTCCTGCCCCAGCACCTGCTCAGGAACCCACACGAGAGAC        | 475          |           |           |

**Supplementary Figure 1 – Nucleotide Blast Results from sequenced TDG product.** The product sequence was run through NCBI nucleotide blast resulting in 3 matches with 98% identities to the bovine TDG transcript.

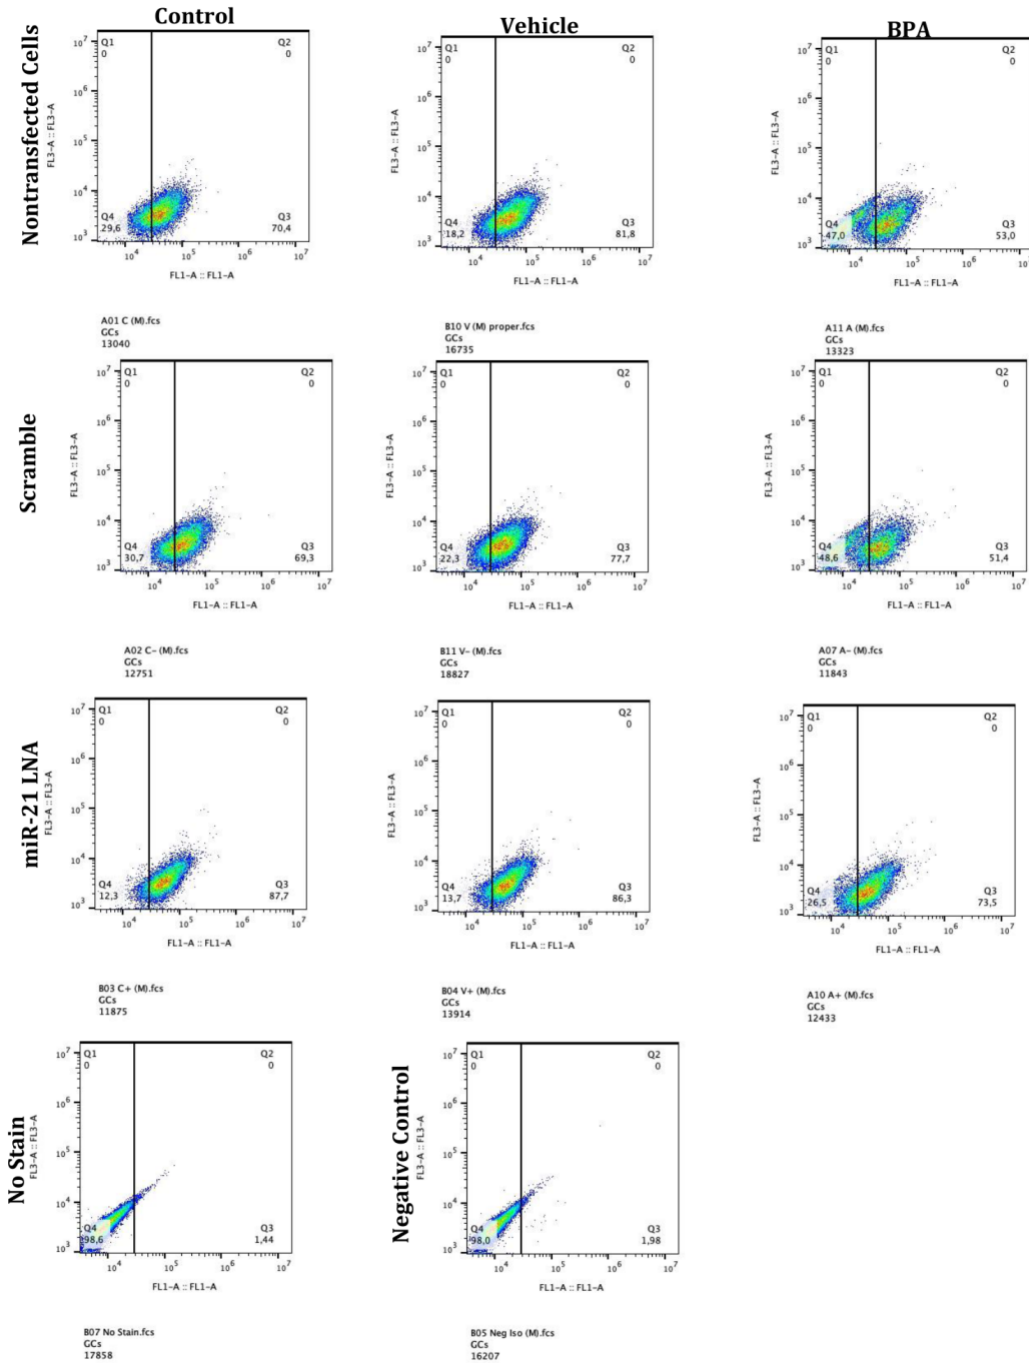

**Supplementary Figure 2 – Flow cytometry of 5’methylcytosine (5mC) in Bovine Granulosa Cells.** Transfected and treated GCs were fixed and permeabilized to allow for immunostaining of 5mC. Immunodetection of 5mC in GCs was achieved by utilizing the same Alexa Fluor 488 conjugated secondary antibody coupled with flow cytometry. Representative flow histograms are represented in for all 9 groups where the x-axis represents the FITC fluorescence from 5mC and the y-axis represents Hoechst stain from nuclear staining.

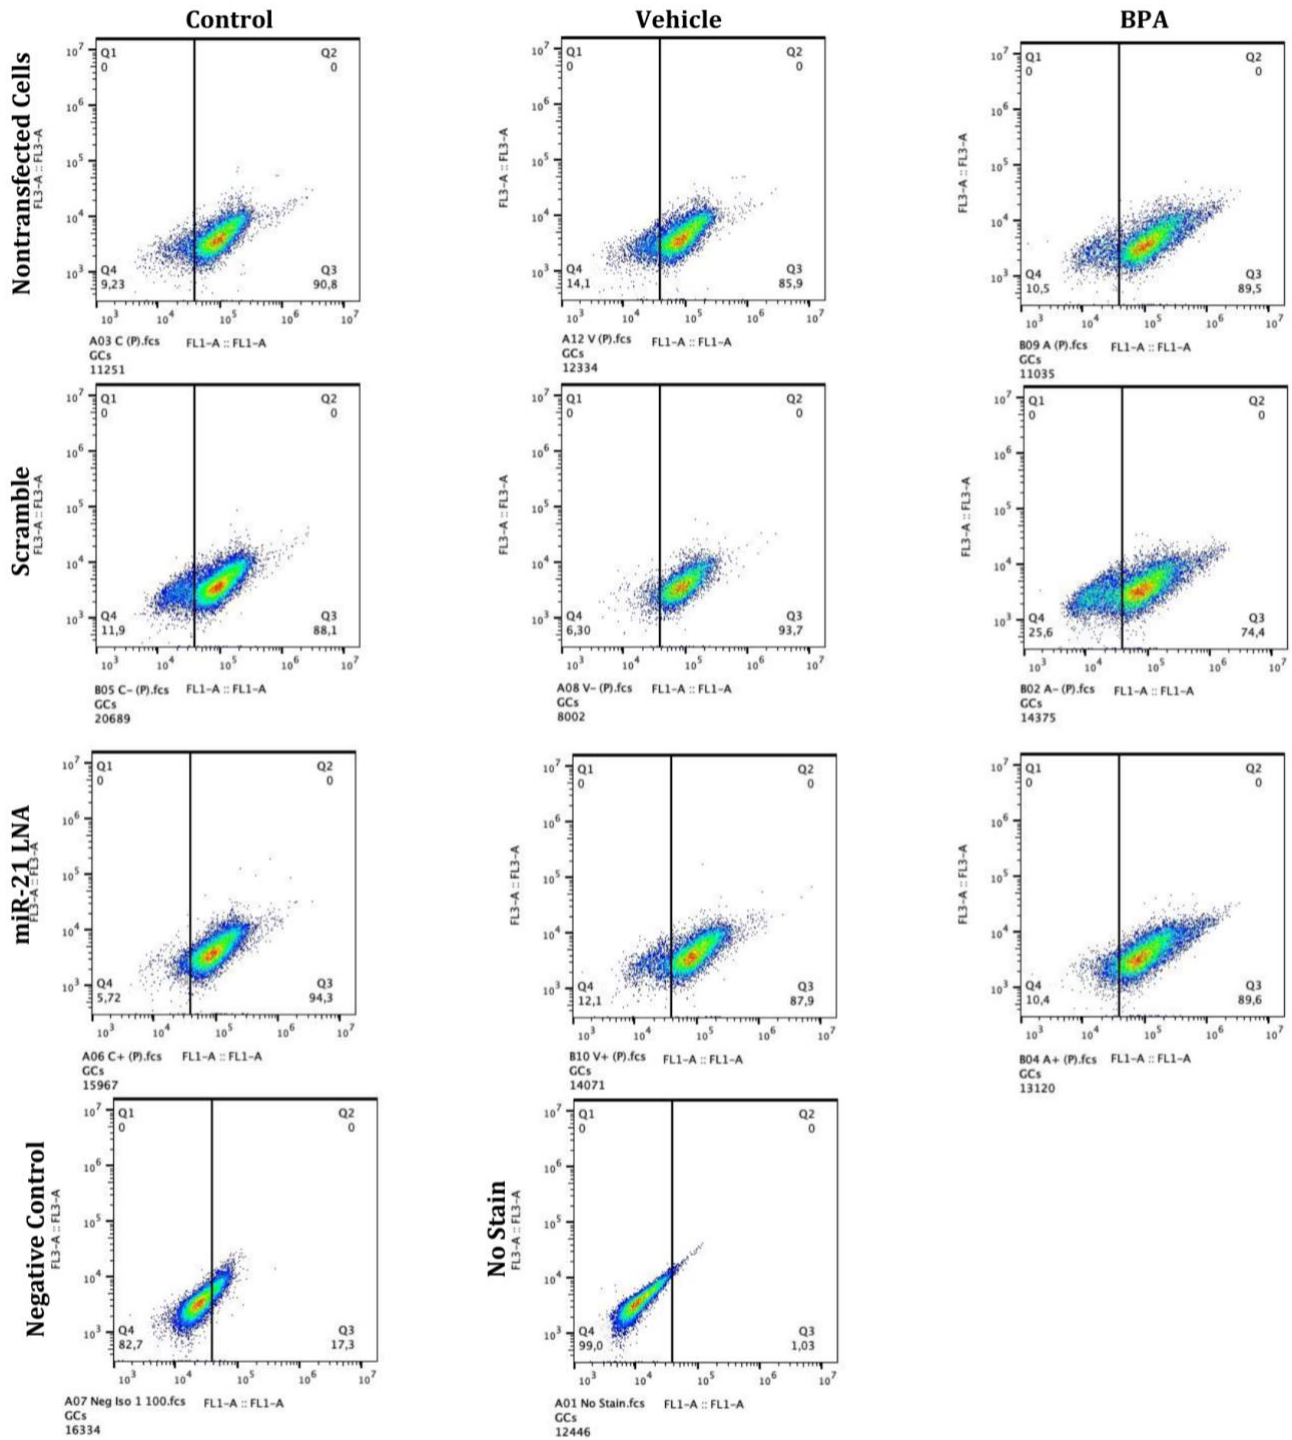

**Supplementary Figure 3 – Figure 9. Flow cytometry of 5’hydroxymethylcytosine (5hmC) in Bovine Granulosa Cells.** Transfected and treated GCs were fixed and permeabilized to allow for immunostaining of 5hmC. Immunodetection of 5hmC in GCs was achieved by utilizing the same Alexa Fluor 488 conjugated secondary antibody coupled with flow cytometry. Representative flow histograms are represented in for all 9 groups where the x-axis represents the FITC fluorescence from 5hmC and the y-axis represents Hoechst stain from nuclear staining.

**Supplementary Table 2.** Statistic reports from parametric and non-parametric analysis on mRNA data in COCs & GCs.

| Gene                                   | Normality | Statistic Report                 |
|----------------------------------------|-----------|----------------------------------|
| <b>Cumulus Oocyte Complexes (COCs)</b> |           |                                  |
| DNMT1                                  | Skewed    | [H(8)=20.0847, p=0.01002]        |
| DNMT3A                                 | Skewed    | [H(8)=20.7973, p=0.007706]       |
| TET1                                   | Skewed    | [H(8)=19.5026, p=0.01239]        |
| TET2                                   | Skewed    | [H(8)=15.7989, p=0.04535]        |
| TET3                                   | Skewed    | [H(8)=20.3919, p=0.008951]       |
| TDG                                    | Skewed    | [H(8)=22.8694, p=0.003536]       |
| <b>Granulosa Cells (GCs)</b>           |           |                                  |
| DNMT1                                  | Skewed    | [H(8)=20.4656, p=0.008711]       |
| DNMT3A                                 | Skewed    | [H(8)=18.0175, p=0.0211]         |
| TET1                                   | Normal    | [F(8,45)=3.840836, p=0.00162406] |
| TET2                                   | Normal    | [F(8,45)=2.51995, p=0.0234676]   |
| TET3                                   | Skewed    | [H(8)=31.7993, p=0.0001012]      |
| TDG                                    | Skewed    | [H(8)=30.0522, p=0.0002069]      |
